# Supplementary material for: Encapsulation of the vanadium substituted Keggin polyoxometalates [α-PVW11O40]4− and [α-PV2W10O40]5− in HKUST-1
Source: Royal Society of Chemistry journal article supplement (doi:10.1039/d4dt01705f), 2024-01-01
Supplement: d4dt01705f1.pdf [file d4dt01705f1.pdf]

## Supplementary Information

### Encapsulation of the Vanadium Substituted Keggin Polyoxometalates [ $\alpha$ -PVW<sub>11</sub>O<sub>40</sub>]<sup>4-</sup> and [ $\alpha$ -PV<sub>2</sub>W<sub>10</sub>O<sub>40</sub>]<sup>5-</sup> in HKUST-1

José C. Orozco,<sup>a</sup> Damola T. Shuaib,<sup>a</sup> LaSalle Swenson,<sup>a</sup> Ying-Pin Chen,<sup>b</sup> Yu-Sheng Chen<sup>b</sup> and M. Ishaque Khan<sup>\*a</sup>

<sup>a</sup>Department of Chemistry, Illinois Institute of Technology, Chicago, IL 60616, USA.

<sup>b</sup>ChemMatCARS, Center for Advanced Radiation Sources, The University of Chicago, 9700 S. Cass Avenue, Argonne, Illinois 60439, USA.

\*khan@iit.edu

## Table of Contents

|                                                                            |    |
|----------------------------------------------------------------------------|----|
| Structure of PV <sub>2</sub> W <sub>10</sub> @HKUST-1 ( <b>2</b> ) .....   | 4  |
| Crystallographic Data Tables for <b>1</b> .....                            | 6  |
| Crystallographic Data Tables for <b>2</b> .....                            | 10 |
| Crystal Structure of <b>1</b> and <b>2</b> : Hydronium Ion Positions ..... | 14 |
| Infrared Spectroscopy .....                                                | 15 |
| Thermogravimetric Analysis .....                                           | 16 |
| BET Surface Area Analysis .....                                            | 17 |
| References .....                                                           | 18 |

Structure of  $PV_2W_{10}@HKUST-1$  (2)

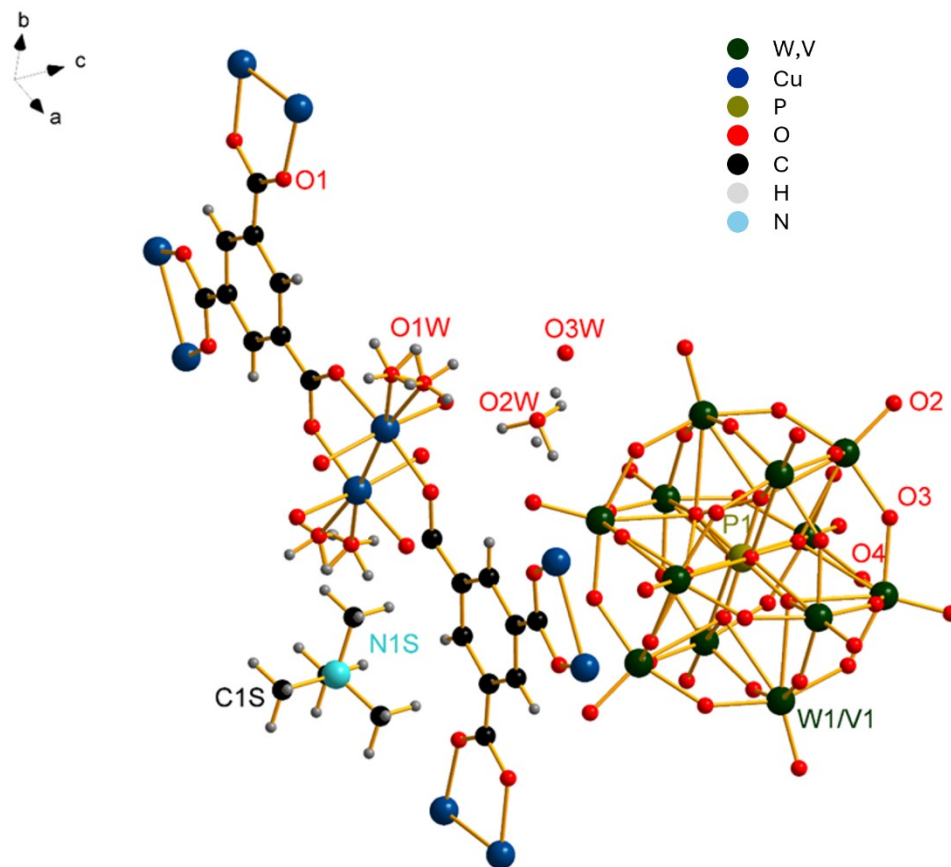

**Fig. S1** Structural fragment of  $PV_2W_{10}@HKUST-1$ . The neighboring, corner sharing vanadium atoms appear randomly located in each  $[PV_2W_{10}O_{40}]^{5-}$  anion and are not distinguished in the figure.

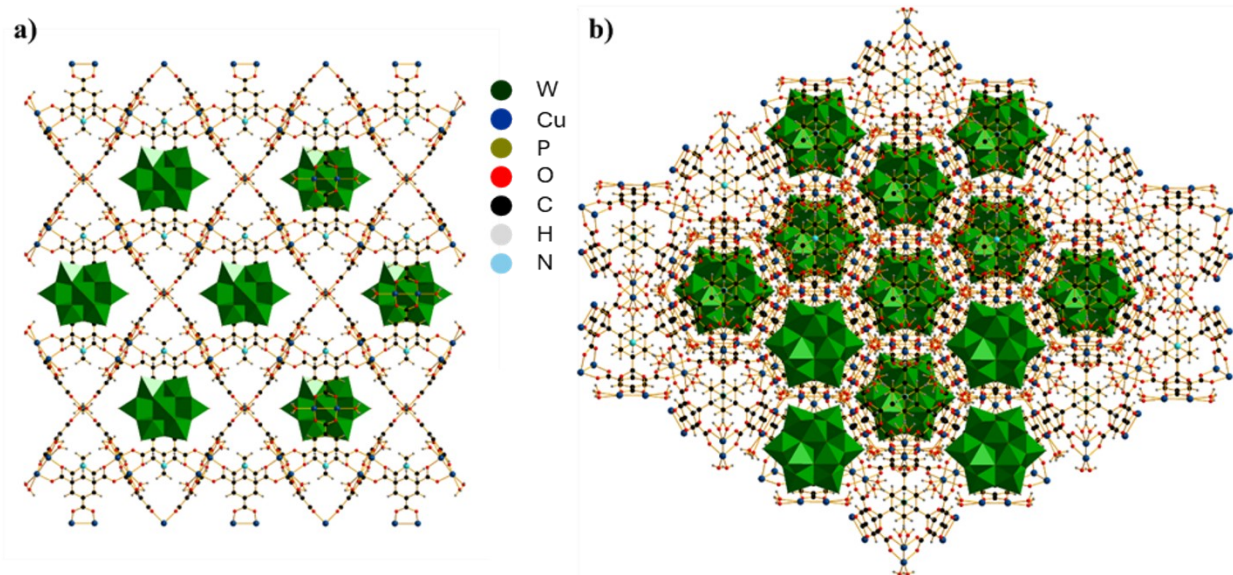

**Fig. S2**  $PV_2W_{10}@HKUST-1\ 2$  viewed along a) the (101) and b) (111) planes; polyhedral representation of the  $[PV_2W_{10}O_{40}]^{5-}$  anions.

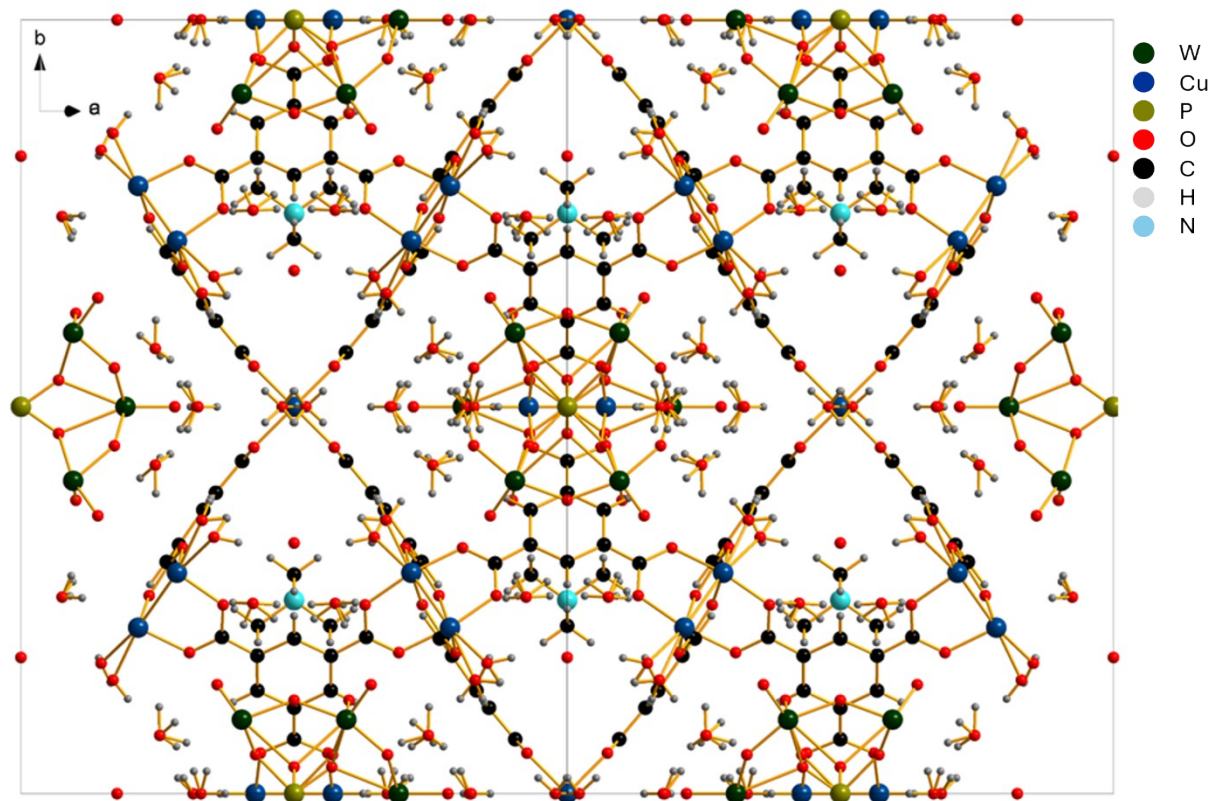

**Fig. S3** Unit cell contents of  $PV_2W_{10}@HKUST-1\ 2$  viewed along (101) plane.

Crystallographic Data Tables for **1**

**Table S1** Fractional Atomic Coordinates ( $\times 10^4$ ) and Equivalent Isotropic Displacement Parameters ( $\text{\AA}^2 \times 10^3$ ) for **1**.  $U_{\text{eq}}$  is defined as 1/3 of the trace of the orthogonalised  $U_{\text{IJ}}$  tensor.

| Atom | <i>x</i>  | <i>y</i> | <i>z</i>  | $U(\text{eq})$ |
|------|-----------|----------|-----------|----------------|
| W1   | 4042.7(2) | 5000     | 4042.7(2) | 76.1(4)        |
| V1   | 4042.7(2) | 5000     | 4042.7(2) | 76.1(4)        |
| Cu1  | 2144.8(5) | 5000     | 2855.2(5) | 73.1(6)        |
| P1   | 5000      | 5000     | 5000      | 67(3)          |
| O1   | 2561(2)   | 4475(2)  | 3173(2)   | 87.5(16)       |
| O3   | 4499(3)   | 5501(3)  | 3800(4)   | 113(3)         |
| O2   | 3590(3)   | 5000     | 3590(3)   | 107(4)         |
| C1   | 2975(3)   | 4300(6)  | 2975(3)   | 84(3)          |
| C2   | 3219(3)   | 3886(5)  | 3219(3)   | 86(3)          |
| C3   | 3660(3)   | 3660(3)  | 3001(5)   | 85(3)          |
| O4   | 4667(6)   | 5333(6)  | 4667(6)   | 79(7)          |
| N1S  | 2500      | 2500     | 2500      | 190(30)        |
| C1S  | 2169(2)   | 2169(2)  | 2169(2)   | 280(30)        |
| O1W  | 1452(6)   | 5000     | 3317(7)   | 128(9)         |
| O2W  | 2538(7)   | 5000     | 4266(8)   | 113(6)         |
| O2U  | 2538(7)   | 5000     | 4266(8)   | 113(6)         |

**Table S2** Anisotropic Displacement Parameters ( $\text{\AA}^2 \times 10^3$ ) for **1**. The Anisotropic displacement factor exponent takes the form:  $-2\pi^2[h^2a^*U_{11}+2hka^*b^*U_{12}+\dots]$ .

| Atom | $U_{11}$ | $U_{22}$ | $U_{33}$ | $U_{23}$ | $U_{13}$ | $U_{12}$ |
|------|----------|----------|----------|----------|----------|----------|
| W1   | 70.5(5)  | 87.5(6)  | 70.5(5)  | 0        | -7.6(3)  | 0        |
| V1   | 70.5(5)  | 87.5(6)  | 70.5(5)  | 0        | -7.6(3)  | 0        |
| Cu1  | 64.1(7)  | 91.0(14) | 64.1(7)  | 0        | 6.8(8)   | 0        |
| P1   | 67(3)    | 67(3)    | 67(3)    | 0        | 0        | 0        |
| O1   | 84(4)    | 96(4)    | 83(4)    | 9(3)     | -1(3)    | -2(3)    |
| O3   | 114(5)   | 114(5)   | 111(7)   | -31(5)   | 31(5)    | -25(6)   |
| O2   | 94(6)    | 131(12)  | 94(6)    | 0        | -20(7)   | 0        |
| C1   | 74(5)    | 102(10)  | 74(5)    | 6(4)     | -5(6)    | 6(4)     |
| C2   | 81(5)    | 94(8)    | 81(5)    | -10(5)   | 1(6)     | -10(5)   |
| C3   | 86(5)    | 86(5)    | 82(8)    | 1(4)     | 1(4)     | -5(6)    |
| O4   | 79(7)    | 79(7)    | 79(7)    | 13(7)    | -13(7)   | 13(7)    |
| N1S  | 90(30)   | 190(30)  | 190(30)  | 0        | 0        | 0        |
| O1W  | 76(13)   | 210(20)  | 98(16)   | 0        | 37(13)   | 0        |
| O2W  | 89(12)   | 159(19)  | 91(12)   | 0        | 10(11)   | 0        |
| O2U  | 89(12)   | 159(19)  | 91(12)   | 0        | 10(11)   | 0        |

**Table S3** Bond Lengths for **1**.

| Atom | Atom             | Length/ Å | Atom | Atom              | Length/ Å |
|------|------------------|-----------|------|-------------------|-----------|
| W1   | O3               | 1.890(4)  | P1   | O4                | 1.52(3)   |
| W1   | O3 <sup>1</sup>  | 1.891(4)  | P1   | O4 <sup>2</sup>   | 1.52(3)   |
| W1   | O3 <sup>2</sup>  | 1.891(4)  | P1   | O4 <sup>10</sup>  | 1.52(3)   |
| W1   | O3 <sup>3</sup>  | 1.891(4)  | P1   | O4 <sup>11</sup>  | 1.52(3)   |
| W1   | O2               | 1.681(13) | P1   | O4 <sup>12</sup>  | 1.52(3)   |
| W1   | O4               | 2.478(14) | O1   | C1                | 1.290(9)  |
| W1   | O4 <sup>2</sup>  | 2.478(14) | C1   | C2                | 1.415(18) |
| Cu1  | Cu1 <sup>4</sup> | 2.639(4)  | C2   | C3                | 1.422(8)  |
| Cu1  | O1 <sup>5</sup>  | 1.948(6)  | C2   | C3 <sup>13</sup>  | 1.422(8)  |
| Cu1  | O1 <sup>6</sup>  | 1.948(6)  | O4   | O4 <sup>7</sup>   | 1.75(3)   |
| Cu1  | O1 <sup>2</sup>  | 1.948(6)  | O4   | O4 <sup>2</sup>   | 1.75(3)   |
| Cu1  | O1               | 1.948(6)  | O4   | O4 <sup>9</sup>   | 1.75(3)   |
| Cu1  | O1W              | 2.187(15) | N1S  | C1S <sup>14</sup> | 1.506(10) |
| Cu1  | O1W <sup>6</sup> | 2.187(15) | N1S  | C1S <sup>15</sup> | 1.506(10) |
| P1   | O4 <sup>7</sup>  | 1.52(3)   | N1S  | C1S               | 1.506(10) |
| P1   | O4 <sup>8</sup>  | 1.52(3)   | N1S  | C1S <sup>16</sup> | 1.506(10) |
| P1   | O4 <sup>9</sup>  | 1.52(3)   | O1W  | O1W <sup>6</sup>  | 0.86(4)   |

<sup>1</sup>+Z,1-X,1-Y; <sup>2</sup>+X,1-Y,+Z; <sup>3</sup>+Z,+X,1-Y; <sup>4</sup>1/2-X,1-Y,1/2-Z; <sup>5</sup>1/2-Z,1-Y,1/2-X; <sup>6</sup>1/2-Z,+Y,1/2-X;  
<sup>7</sup>+X,+Y,1-Z; <sup>8</sup>1-X,1-Y,+Z; <sup>9</sup>1-X,+Y,+Z; <sup>10</sup>1-X,1-Y,1-Z; <sup>11</sup>1-X,+Y,1-Z; <sup>12</sup>+X,1-Y,1-Z; <sup>13</sup>+Z,+X,+Y;  
<sup>14</sup>+X,1/2-Y,1/2-Z; <sup>15</sup>1/2-X,1/2-Y,+Z; <sup>16</sup>1/2-X,+Y,1/2-Z

**Table S4** Bond Angles for **1**.

| Atom Atom Atom  |     |                  | Angle/°   | Atom Atom Atom   |    |                  | Angle/°     |
|-----------------|-----|------------------|-----------|------------------|----|------------------|-------------|
| O3              | W1  | O3 <sup>1</sup>  | 86.8(5)   | O4 <sup>7</sup>  | P1 | O4 <sup>12</sup> | 180.0(9)    |
| O3 <sup>1</sup> | W1  | O3 <sup>2</sup>  | 155.7(8)  | O4               | P1 | O4 <sup>9</sup>  | 70.529(4)   |
| O3              | W1  | O3 <sup>2</sup>  | 88.2(6)   | O4               | P1 | O4 <sup>8</sup>  | 109.471(8)  |
| O3              | W1  | O3 <sup>3</sup>  | 155.7(8)  | O4 <sup>7</sup>  | P1 | O4 <sup>10</sup> | 109.471(10) |
| O3 <sup>1</sup> | W1  | O3 <sup>3</sup>  | 88.2(6)   | O4 <sup>2</sup>  | P1 | O4 <sup>9</sup>  | 109.471(1)  |
| O3 <sup>3</sup> | W1  | O3 <sup>2</sup>  | 86.8(5)   | O4 <sup>2</sup>  | P1 | O4 <sup>8</sup>  | 180.0(9)    |
| O3 <sup>3</sup> | W1  | O4 <sup>2</sup>  | 63.7(4)   | O4 <sup>2</sup>  | P1 | O4 <sup>12</sup> | 70.529(9)   |
| O3              | W1  | O4 <sup>2</sup>  | 92.8(5)   | O4 <sup>9</sup>  | P1 | O4 <sup>10</sup> | 109.471(2)  |
| O3 <sup>3</sup> | W1  | O4               | 92.8(5)   | O4 <sup>8</sup>  | P1 | O4 <sup>7</sup>  | 70.529(2)   |
| O3 <sup>1</sup> | W1  | O4               | 63.7(4)   | O4               | P1 | O4 <sup>12</sup> | 109.5       |
| O3 <sup>1</sup> | W1  | O4 <sup>2</sup>  | 92.8(5)   | O4 <sup>11</sup> | P1 | O4 <sup>12</sup> | 109.471(2)  |
| O3 <sup>2</sup> | W1  | O4               | 92.8(5)   | O4 <sup>8</sup>  | P1 | O4 <sup>12</sup> | 109.471(1)  |
| O3              | W1  | O4               | 63.7(4)   | O4 <sup>8</sup>  | P1 | O4 <sup>11</sup> | 109.471(10) |
| O3 <sup>2</sup> | W1  | O4 <sup>2</sup>  | 63.7(4)   | O4 <sup>9</sup>  | P1 | O4 <sup>12</sup> | 70.529(8)   |
| O2              | W1  | O3               | 102.1(4)  | O4 <sup>7</sup>  | P1 | O4 <sup>11</sup> | 70.529(1)   |
| O2              | W1  | O3 <sup>1</sup>  | 102.1(4)  | O4 <sup>10</sup> | P1 | O4 <sup>12</sup> | 70.529(7)   |
| O2              | W1  | O3 <sup>2</sup>  | 102.1(4)  | C1               | O1 | Cu1              | 123.6(7)    |
| O2              | W1  | O3 <sup>3</sup>  | 102.1(4)  | W1               | O3 | W1 <sup>13</sup> | 140.3(7)    |
| O2              | W1  | O4               | 159.3(5)  | O1               | C1 | O1 <sup>14</sup> | 123.5(12)   |
| O2              | W1  | O4 <sup>2</sup>  | 159.3(5)  | O1 <sup>14</sup> | C1 | C2               | 118.2(6)    |
| O4 <sup>2</sup> | W1  | O4               | 41.4(10)  | O1               | C1 | C2               | 118.2(6)    |
| O1 <sup>2</sup> | Cu1 | Cu1 <sup>4</sup> | 84.61(19) | C1               | C2 | C3               | 120.5(7)    |
| O1              | Cu1 | Cu1 <sup>4</sup> | 84.61(19) | C1               | C2 | C3 <sup>15</sup> | 120.5(7)    |
| O1 <sup>5</sup> | Cu1 | Cu1 <sup>4</sup> | 84.61(19) | C3               | C2 | C3 <sup>15</sup> |             |
| O1 <sup>6</sup> | Cu1 | Cu1 <sup>4</sup> | 84.61(19) | C2 <sup>16</sup> | C3 | C2               | 121.3(14)   |
| O1 <sup>5</sup> | Cu1 | O1 <sup>6</sup>  | 90.2(4)   | W1               | O4 | W1 <sup>13</sup> | 91.7(7)     |
| O1 <sup>2</sup> | Cu1 | O1               | 90.2(4)   | W1               | O4 | W1 <sup>1</sup>  | 91.7(7)     |
| O1 <sup>5</sup> | Cu1 | O1               | 88.8(4)   | W1 <sup>1</sup>  | O4 | W1 <sup>13</sup> | 91.7(7)     |
| O1 <sup>2</sup> | Cu1 | O1 <sup>6</sup>  | 88.8(4)   | P1               | O4 | W1 <sup>1</sup>  | 124.0(5)    |
| O1 <sup>5</sup> | Cu1 | O1 <sup>2</sup>  | 169.2(4)  | P1               | O4 | W1               | 124.0(5)    |
| O1 <sup>6</sup> | Cu1 | O1               | 169.2(4)  | P1               | O4 | W1 <sup>13</sup> |             |
| O1 <sup>5</sup> | Cu1 | O1W              | 87.4(4)   | P1               | O4 | O4 <sup>7</sup>  | 54.736(3)   |
| O1 <sup>2</sup> | Cu1 | O1W              | 103.2(4)  | P1               | O4 | O4 <sup>9</sup>  | 54.736(3)   |

|                  |     |                  |            |                   |     |                   |            |
|------------------|-----|------------------|------------|-------------------|-----|-------------------|------------|
| O1 <sup>6</sup>  | Cu1 | O1W              | 87.4(4)    | P1                | O4  | O4 <sup>2</sup>   | 54.736(2)  |
| O1               | Cu1 | O1W              | 103.2(4)   | O4 <sup>9</sup>   | O4  | W1 <sup>1</sup>   | 69.3(5)    |
| O1 <sup>6</sup>  | Cu1 | O1W <sup>5</sup> | 103.2(4)   | O4 <sup>7</sup>   | O4  | W1 <sup>13</sup>  | 69.3(5)    |
| O1 <sup>2</sup>  | Cu1 | O1W <sup>5</sup> | 87.4(4)    | O4 <sup>9</sup>   | O4  | W1 <sup>13</sup>  | 131.41(16) |
| O1 <sup>5</sup>  | Cu1 | O1W <sup>5</sup> | 103.2(4)   | O4 <sup>2</sup>   | O4  | W1 <sup>13</sup>  | 131.41(16) |
| O1               | Cu1 | O1W <sup>5</sup> | 87.4(4)    | O4 <sup>7</sup>   | O4  | W1                | 131.41(16) |
| O1W <sup>5</sup> | Cu1 | Cu1 <sup>4</sup> | 168.7(5)   | O4 <sup>9</sup>   | O4  | W1                | 131.41(16) |
| O1W              | Cu1 | Cu1 <sup>4</sup> | 168.7(5)   | O4 <sup>2</sup>   | O4  | W1                | 69.3(5)    |
| O1W <sup>5</sup> | Cu1 | O1W              | 22.6(10)   | O4 <sup>7</sup>   | O4  | W1 <sup>1</sup>   | 131.41(16) |
| O4               | P1  | O4 <sup>7</sup>  | 70.529(3)  | O4 <sup>2</sup>   | O4  | W1 <sup>1</sup>   | 131.41(17) |
| O4 <sup>8</sup>  | P1  | O4 <sup>9</sup>  | 70.529(2)  | O4 <sup>2</sup>   | O4  | W1 <sup>1</sup>   | 131.41(17) |
| O4 <sup>2</sup>  | P1  | O4 <sup>10</sup> | 109.471(1) | O47               | O4  | O4 <sup>9</sup>   | 90.001(3)  |
| O4               | P1  | O4 <sup>2</sup>  | 70.529(8)  | O4 <sup>2</sup>   | O4  | O4 <sup>9</sup>   | 90.001(2)  |
| O4               | P1  | O4 <sup>11</sup> | 109.471(2) | C1S <sup>17</sup> | N1S | C1S <sup>18</sup> | 109.5      |

<sup>1</sup>+Z,1-X,1-Y; <sup>2</sup>+X,1-Y,+Z; <sup>3</sup>+Z,+X,1-Y; <sup>4</sup>1/2-X,1-Y,1/2-Z; <sup>5</sup>1/2-Z,+Y,1/2-X; <sup>6</sup>1/2-Z,1-Y,1/2-X; <sup>7</sup>1-X,+Y,+Z; <sup>8</sup>1-X,+Y,1-Z; <sup>9</sup>+X,+Y,1-Z; <sup>10</sup>1-X,1-Y,1-Z; <sup>11</sup>1-X,1-Y,+Z; <sup>12</sup>+X,1-Y,1-Z; <sup>13</sup>+Y,1-Z,+X; <sup>14</sup>+Z,+Y,+X; <sup>15</sup>+Z,+X,+Y; <sup>16</sup>+Y,+Z,+X; <sup>17</sup>+X,1/2-Y,1/2-Z; <sup>18</sup>1/2-X,+Y,1/2-Z;

**Table S5** Hydrogen Atom Coordinates ( $\text{\AA} \times 10^4$ ) and Isotropic Displacement Parameters ( $\text{\AA}^2 \times 10^3$ ) for **1**.

| Atom | x         | y        | z         | U(eq) |
|------|-----------|----------|-----------|-------|
| H3   | 3805.36   | 3805.35  | 2703.97   | 102   |
| H1SA | 2384.37   | 1953.58  | 1953.58   | 415   |
| H1SB | 1953.58   | 1953.58  | 2384.37   | 415   |
| H1SC | 1953.58   | 2384.37  | 1953.58   | 415   |
| H1WA | 1425.99   | 4796.6   | 3574.3    | 153   |
| H1WB | 1210.39   | 5203.4   | 3248      | 153   |
| H    | 2553.34   | 5289.7   | 4408.91   | 169   |
| HA   | 2813.54   | 5000     | 4097.41   | 169   |
| H2UA | 2690(160) | 5290(90) | 4430(100) | 169   |
| H2UB | 2700(200) | 5000     | 3930(70)  | 169   |
| H2UC | 2690(160) | 4710(90) | 4430(100) | 169   |



**Table S6** Fractional Atomic Coordinates ( $\times 10^4$ ) and Equivalent Isotropic Displacement Parameters ( $\text{\AA}^2 \times 10^3$ ) for **2**.  $U_{\text{eq}}$  is defined as 1/3 of the trace of the orthogonalised  $U_{\text{IJ}}$  tensor.

| Atom | <i>x</i>  | <i>y</i> | <i>z</i>  | <b>U(eq)</b> |
|------|-----------|----------|-----------|--------------|
| W1   | 4043.8(2) | 5000     | 4043.8(2) | 67.9(5)      |
| V1   | 4043.8(2) | 5000     | 4043.8(2) | 67.9(5)      |
| Cu1  | 2145.1(6) | 5000     | 2854.9(6) | 64.3(7)      |
| P1   | 5000      | 5000     | 5000      | 56(3)        |
| O1   | 2560(3)   | 4476(3)  | 3177(3)   | 78.5(18)     |
| O3   | 4497(4)   | 5503(4)  | 3793(5)   | 107(4)       |
| O2   | 3592(4)   | 5000     | 3592(4)   | 100(5)       |
| C1   | 2976(4)   | 4297(6)  | 2976(4)   | 77(4)        |
| C2   | 3216(4)   | 3890(5)  | 3216(4)   | 73(3)        |
| C3   | 3667(4)   | 3667(4)  | 2995(6)   | 75(3)        |
| O4   | 4655(7)   | 5345(7)  | 4655(7)   | 80(9)        |
| N1S  | 2500      | 2500     | 2500      | 140(30)      |
| C1S  | 2169(2)   | 2169(2)  | 2169(2)   | 250(40)      |
| O1W  | 1467(11)  | 5000     | 3315(11)  | 130(16)      |
| O2W  | 2541(10)  | 5000     | 4247(10)  | 125(9)       |
| O2U  | 2541(10)  | 5000     | 4247(10)  | 125(9)       |
| O3W  | 1760(20)  | 5000     | 5000      | 120(20)      |

**Table S7** Anisotropic Displacement Parameters ( $\text{\AA}^2 \times 10^3$ ) for **2**. The Anisotropic displacement factor exponent takes the form:  $-2\pi^2[h^2a^*2U_{11}+2hka^*b^*U_{12}+\dots]$ .

| Atom | U11     | U22      | U33     | U23    | U13     | U12    |
|------|---------|----------|---------|--------|---------|--------|
| W1   | 62.1(6) | 79.4(7)  | 62.1(6) | 0      | -8.2(4) | 0      |
| V1   | 62.1(6) | 79.4(7)  | 62.1(6) | 0      | -8.2(4) | 0      |
| Cu1  | 59.6(9) | 73.8(14) | 59.6(9) | 0      | 6.3(9)  | 0      |
| P1   | 56(3)   | 56(3)    | 56(3)   | 0      | 0       | 0      |
| O1   | 74(4)   | 85(4)    | 76(4)   | 9(4)   | 3(3)    | 6(3)   |
| O3   | 109(6)  | 109(6)   | 103(9)  | -33(6) | 33(6)   | -31(8) |
| O2   | 81(6)   | 139(15)  | 81(6)   | 0      | -20(8)  | 0      |
| C1   | 70(5)   | 92(11)   | 70(5)   | 6(5)   | -5(7)   | 6(5)   |
| C2   | 73(5)   | 74(8)    | 73(5)   | -5(5)  | 0(6)    | -5(5)  |
| C3   | 74(5)   | 74(5)    | 77(8)   | 4(5)   | 4(5)    | -4(7)  |
| O4   | 80(9)   | 80(9)    | 80(9)   | 14(9)  | -14(9)  | 14(9)  |
| N1S  | 140(30) | 140(30)  | 140(30) | 0      | 0       | 0      |
| C1S  | 250(40) | 250(40)  | 250(40) | 60(40) | 60(40)  | 60(40) |
| O1W  | 90(20)  | 180(20)  | 120(30) | 0      | 50(20)  | 0      |
| O2W  | 91(17)  | 190(30)  | 95(17)  | 0      | 12(14)  | 0      |
| O2U  | 91(17)  | 190(30)  | 95(17)  | 0      | 12(14)  | 0      |
| O3W  | 40(30)  | 160(30)  | 160(30) | 0      | 0       | 0      |

**Table S8** Bond Lengths for **2**.

| <b>Atom</b> | <b>Atom</b>      | <b>Length/Å</b> | <b>Atom</b> | <b>Atom</b>       | <b>Length/Å</b> |
|-------------|------------------|-----------------|-------------|-------------------|-----------------|
| W1          | O3 <sup>1</sup>  | 1.896(5)        | P1          | O4                | 1.57(3)         |
| W1          | O3               | 1.896(5)        | P1          | O4 <sup>10</sup>  | 1.57(3)         |
| W1          | O3 <sup>2</sup>  | 1.896(5)        | P1          | O4 <sup>3</sup>   | 1.57(3)         |
| W1          | O3 <sup>3</sup>  | 1.896(5)        | P1          | O4 <sup>11</sup>  | 1.57(3)         |
| W1          | O2               | 1.679(14)       | P1          | O4 <sup>12</sup>  | 1.57(3)         |
| W1          | O4               | 2.445(17)       | O1          | C1                | 1.301(10)       |
| W1          | O4 <sup>3</sup>  | 2.445(17)       | C1          | C2                | 1.39(2)         |
| Cu1         | Cu1 <sup>4</sup> | 2.637(4)        | C2          | C3                | 1.443(9)        |
| Cu1         | O1 <sup>5</sup>  | 1.950(7)        | C2          | C3 <sup>13</sup>  | 1.443(9)        |
| Cu1         | O1               | 1.950(7)        | O4          | O4 <sup>7</sup>   | 1.81(4)         |
| Cu1         | O1 <sup>3</sup>  | 1.950(7)        | O4          | O4 <sup>3</sup>   | 1.81(4)         |
| Cu1         | O1 <sup>6</sup>  | 1.950(7)        | O4          | O4 <sup>9</sup>   | 1.81(4)         |
| Cu1         | O1W <sup>5</sup> | 2.15(2)         | N1S         | C1S               | 1.505(10)       |
| Cu1         | O1W              | 2.15(2)         | N1S         | C1S <sup>14</sup> | 1.505(10)       |
| P1          | O4 <sup>7</sup>  | 1.57(3)         | N1S         | C1S <sup>15</sup> | 1.505(10)       |
| P1          | O4 <sup>8</sup>  | 1.57(3)         | N1S         | C1S <sup>16</sup> | 1.505(10)       |
| P1          | O4 <sup>9</sup>  | 1.57(3)         | O1W         | O1W <sup>5</sup>  | 0.81(7)         |

**Table S9** Bond Angles for **2**.

| Atom            | Atom | Atom             | Angle/°   | Atom             | Atom | Atom             | Angle/°     |
|-----------------|------|------------------|-----------|------------------|------|------------------|-------------|
| O3 <sup>1</sup> | W1   | O3 <sup>2</sup>  | 157.0 (9) | O4 <sup>7</sup>  | P1   | O4 <sup>12</sup> | 109.471 (4) |
| O3 <sup>2</sup> | W1   | O3               | 88.2 (7)  | O4 <sup>12</sup> | P1   | O4 <sup>8</sup>  | 180.0 (11)  |
| O3 <sup>1</sup> | W1   | O3               | 87.2 (7)  | O4 <sup>9</sup>  | P1   | O4 <sup>7</sup>  | 70.529 (2)  |
| O3 <sup>1</sup> | W1   | O3               | 88.2 (7)  | O4 <sup>2</sup>  | P1   | O4 <sup>10</sup> | 109.471(1)  |
| O3 <sup>2</sup> | W1   | O3 <sup>3</sup>  | 87.2(7)   | O4               | P1   | O4 <sup>12</sup> | 70.529 (5)  |
| O3 <sup>3</sup> | W1   | O3               | 157.0 (9) | O4 <sup>7</sup>  | P1   | O4 <sup>10</sup> | 109.471(11) |
| O3              | W1   | O4               | 63.7(5)   | O4 <sup>2</sup>  | P1   | O4 <sup>12</sup> | 109.471(1)  |
| O3 <sup>1</sup> | W1   | O4               | 63.7(5)   | O4               | P1   | O4 <sup>11</sup> | 109.471(1)  |
| O3              | W1   | O4 <sup>2</sup>  | 94.2(6)   | O4 <sup>9</sup>  | P1   | O4 <sup>12</sup> | 70.529(2)   |
| O3 <sup>2</sup> | W1   | O4               | 63.7(5)   | O4 <sup>9</sup>  | P1   | O4 <sup>11</sup> | 109.471 (1) |
| O3 <sup>2</sup> | W1   | O4               | 94.2(6)   | O4 <sup>7</sup>  | P1   | O4 <sup>12</sup> | 109.471 (6) |
| O3 <sup>3</sup> | W1   | O4 <sup>2</sup>  | 63.7(5)   | O4 <sup>12</sup> | P1   | O4 <sup>11</sup> | 70.529 (10) |
| O3 <sup>1</sup> | W1   | O4 <sup>2</sup>  | 94.2(6)   | O4               | P1   | O4 <sup>8</sup>  | 109.471 (3) |
| O3 <sup>3</sup> | W1   | O4               | 94.2(6)   | O4 <sup>10</sup> | P1   | O4 <sup>11</sup> | 70.529(8)   |
| O2              | W1   | O3 <sup>1</sup>  | 101.5(4)  | O4 <sup>2</sup>  | P1   | O4 <sup>8</sup>  | 70.529(1)   |
| O2              | W1   | O3               | 101.5(4)  | O4 <sup>12</sup> | P1   | O4 <sup>10</sup> | 109.471 (2) |
| O2              | W1   | O3 <sup>3</sup>  | 101.5(4)  | C1               | O1   | Cu1              | 123.3(7)    |
| O2              | W1   | O3 <sup>2</sup>  | 101.5(4)  | W1 <sup>13</sup> | O3   | W1               | 139.0 (8)   |
| O2              | W1   | O4               | 158.3(6)  | O1 <sup>14</sup> | C1   | O1               | 123.4(13)   |
| O2              | W1   | O4 <sup>2</sup>  | 158.3(6)  | O1               | C1   | C2               | 118.3(6)    |
| O4 <sup>2</sup> | W1   | O4               | 43.5(12)  | O1 <sup>14</sup> | C1   | C2               | 118.3(6)    |
| O1              | Cu1  | Cu1 <sup>4</sup> | 84.9(2)   | C1               | C2   | C3               | 120.0(8)    |
| O1 <sup>2</sup> | Cu1  | Cu1 <sup>4</sup> | 84.9(2)   | C1               | C2   | C3 <sup>15</sup> | 120.0(8)    |
| O1 <sup>5</sup> | Cu1  | Cu1 <sup>4</sup> | 84.9(2)   | C3               | C2   | C3 <sup>15</sup> | 119.9(15)   |
| O1 <sup>6</sup> | Cu1  | Cu1 <sup>4</sup> | 84.9(2)   | C2               | C3   | C2 <sup>16</sup> | 120.1(15)   |
| O1              | Cu1  | O1 <sup>6</sup>  | 89.2(4)   | W1 <sup>13</sup> | O4   | W1               | 93.2(9)     |
| O1 <sup>2</sup> | Cu1  | O1 <sup>6</sup>  | 169.8(4)  | W1 <sup>13</sup> | O4   | W1 <sup>1</sup>  | 93.2(9)     |
| O1              | Cu1  | O1 <sup>5</sup>  | 169.8(4)  | W1 <sup>1</sup>  | O4   | W1               | 93.2(9)     |
| O1 <sup>6</sup> | Cu1  | O1 <sup>5</sup>  | 89.9(4)   | P1               | O4   | W1 <sup>1</sup>  | 123.0(6)    |
| O1              | Cu1  | O1 <sup>2</sup>  | 89.9(4)   | P1               | O4   | W1 <sup>13</sup> | 123.0(6)    |
| O1 <sup>2</sup> | Cu1  | O1 <sup>5</sup>  | 89.2(4)   | P1               | O4   | W1               | 123.0(6)    |
| O1              | Cu1  | O1W <sup>6</sup> | 87.4(7)   | P1               | O4   | O4 <sup>7</sup>  | 54.738(3)   |
| O1 <sup>2</sup> | Cu1  | O1W              | 102.7(7)  | P1               | O4   | O4 <sup>12</sup> | 54.738(4)   |

|                 |     |                  |          |                  |    |                  |           |
|-----------------|-----|------------------|----------|------------------|----|------------------|-----------|
| O1 <sup>5</sup> | Cu1 | O1W              | 87.4(7)  | P1               | O4 | O4 <sup>2</sup>  | 54.738(3) |
| O1 <sup>2</sup> | Cu1 | O1W <sup>6</sup> | 87.4(7)  | O4 <sup>12</sup> | O4 | W1 <sup>1</sup>  | 68.3(6)   |
| O1 <sup>6</sup> | Cu1 | O1W              | 87.4(7)  | O4 <sup>7</sup>  | O4 | W1 <sup>13</sup> | 68.3(6)   |
| O1 <sup>6</sup> | Cu1 | O1W <sup>6</sup> | 102.7(7) | O4 <sup>2</sup>  | O4 | W1               | 68.3(6)   |
| O1              | Cu1 | O1W              | 102.7(7) | O4 <sup>7</sup>  | O4 | W1               | 131.1(2)  |

<sup>1</sup>+Z,1-X,1-Y; <sup>2</sup>+X,1-Y,+Z; <sup>3</sup>+Z,+X,1-Y; <sup>4</sup>1/2-X,1-Y,1/2-Z; <sup>5</sup>1/2-Z,1-Y,1/2-X; <sup>6</sup>1/2-Z,+Y,1/2-X; <sup>7</sup>1-X,+Y,+Z; <sup>8</sup>1-X,1-Y,+Z; <sup>9</sup>1-X,+Y,1-Z; <sup>10</sup>1-X,1-Y,1-Z; <sup>11</sup>+X,1-Y,1-Z; <sup>12</sup>+X,+Y,1-Z; <sup>13</sup>+Y,1-Z,+X; <sup>14</sup>+Z,+Y,+X; <sup>15</sup>+Z,+X,+Y; <sup>16</sup>+Y,+Z,+X

**Table S10** Hydrogen Atom Coordinates ( $\text{\AA}\times 10^4$ ) and Isotropic Displacement Parameters ( $\text{\AA}^2\times 10^3$ ) for **2**.

| Atom | x         | y        | z         | U(eq) |
|------|-----------|----------|-----------|-------|
| H3   | 3817.99   | 3818.01  | 2702.65   | 90    |
| H1SA | 2384.58   | 1953.79  | 1953.79   | 380   |
| H1SB | 1953.79   | 1953.79  | 2384.58   | 380   |
| H1SC | 1953.79   | 2384.58  | 1953.79   | 380   |
| H1WA | 1442.34   | 4797.3   | 3566.34   | 156   |
| H1WB | 1224.64   | 5202.7   | 3246.64   | 156   |
| H    | 2556.08   | 5289.7   | 4390.03   | 187   |
| HA   | 2815.98   | 5000     | 4078.53   | 187   |
| H2UA | 2740(140) | 5290(90) | 4340(100) | 187   |
| H2UB | 2530(180) | 5000     | 3880(20)  | 187   |
| H2UC | 2740(140) | 4710(90) | 4340(100) | 187   |

### Crystal Structure of **1** and **2**: Hydronium Ion Positions

The possible sites of hydronium ( $\text{H}_3\text{O}^+$ ) were O1w, O2w, and O3W. The position of O1w (at the open Cu sites) was less likely because the presence of the Keggin species can weaken the coordination between  $\text{Cu}^{2+}$  and BTC ligands, thus making copper more positive to repel  $\text{H}_3\text{O}^+$ . The O2w sites were closer to negatively charged POMs than the O3w sites were, as indicated  $\text{H}_3\text{O}^+$  may prefer the O2w sites to the O3w sites. Therefore, two and three  $\text{H}_3\text{O}^+$  counterions were assigned on the O2w sites of **1** and **2**, respectively, to achieve charge balance.

To resolve the high residue on the O2w sites, reasonable solvent amount in the pores of POM@HKUST-1 should be considered. The TGA data revealed that approximately 10 wt% of solvent (most likely  $\text{H}_2\text{O}$ ) was present in the structure. Besides the O1w site for coordinated  $\text{H}_2\text{O}$  (12  $\text{H}_2\text{O}$  per POM@HKUST-1), the O2w sites were assigned to be  $\text{H}_3\text{O}^+$  and  $\text{H}_2\text{O}$  for reaching

10% solvent amount. The ratio between  $\text{H}_3\text{O}^+ / \text{H}_2\text{O}$  on the O2w sites were 3/9 in the W10 structure (**1**) and 2/10 in the W11 structure (**2**). Regarding those disorders shown in the structures, the coordinated  $\text{H}_2\text{O}$  (O1w) at the open Cu sites was split into two disorder parts for elimination of an alert B in CIF check (low main mol Ueq as compared to neighbor of Cu). Coordinated water molecules bound to copper sites account for approximately 3% of the structure.

#### Infrared Spectroscopy

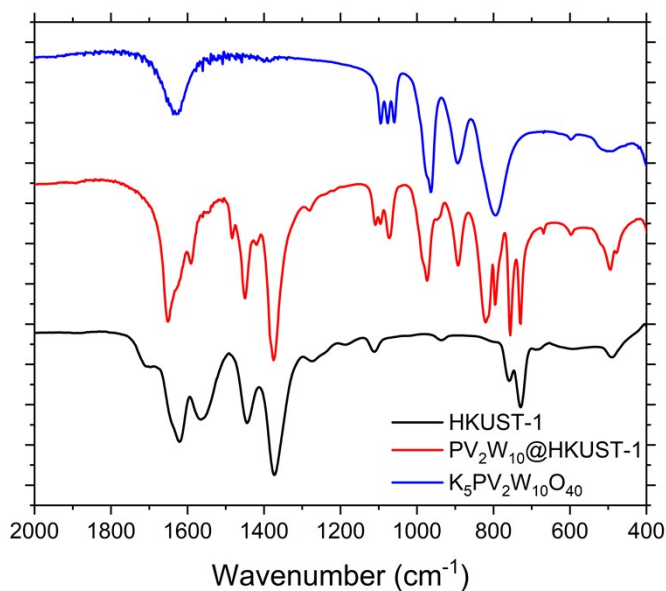

**Fig. S4** FTIR spectra of **2** and its constituents HKUST-1 and the divanadium substituted Keggin POM  $\text{K}_5[\alpha\text{-PV}_2\text{W}_{10}\text{O}_{40}]$ . Prominent bands in the FTIR spectrum of **2**: 1651 (s), 1591 (m), 1483 (m), 1450 (s), 1419 (m, sh), 1375 (s), 1280 (w), 1109 (w), 1095 (w), 1072 (w), 974 (m), 949 (w, sh), 893 (m), 820 (s), 796 (s), 756 (s), 729 (s), 669 (w), 598 (w), 494 (m), 478 (w, sh).

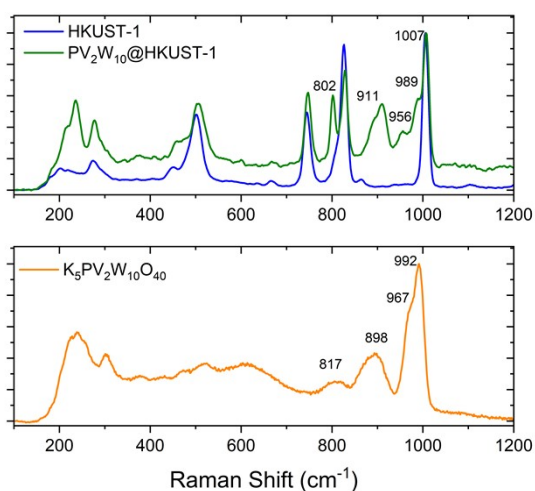

**Fig. S5** Raman spectra of **2** and its constituents HKUST-1 and the di-vanadium substituted Keggin POM  $K_5[\alpha\text{-PV}_2\text{W}_{10}\text{O}_{40}]$  in the 100 – 1200  $\text{cm}^{-1}$  range.

### Thermogravimetric Analysis

The TGA profiles of **1** and **2** (Figure S5) each show two marked weight loss regions below 400 °C. The first step is associated with water loss terminating below ca. 150 °C and the second corresponds to MOF decomposition initiating at ca. 250 °C. HKUST-1 has a reported thermal stability of ca. 240 °C.<sup>1</sup> The water content of **1** (14%) and **2** (11%) determined by TGA is consistent with total water (coordinated and non-coordinated) content observed from single crystal structure analysis.

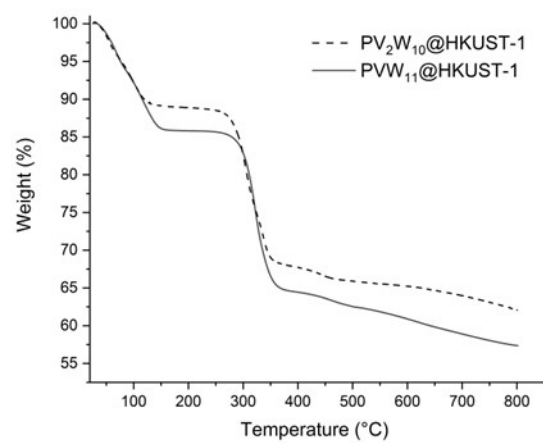

**Fig. S6** TGA trace of PVW<sub>11</sub>@HKUST-1 and PV<sub>2</sub>W<sub>10</sub>@HKUST-1 in the 25-800 °C range (Ar at 50 ml/min).



## BET Surface Area Analysis

Figure S7 shows the nitrogen adsorption/desorption isotherms of HKUST-1, PV<sub>2</sub>W<sub>10</sub>@HKUST-1, and PVW<sub>11</sub>@HKUST-1. The isotherms indicate that the encapsulation of POMs in HKUST-1 results in a decreased surface area (Table S11).

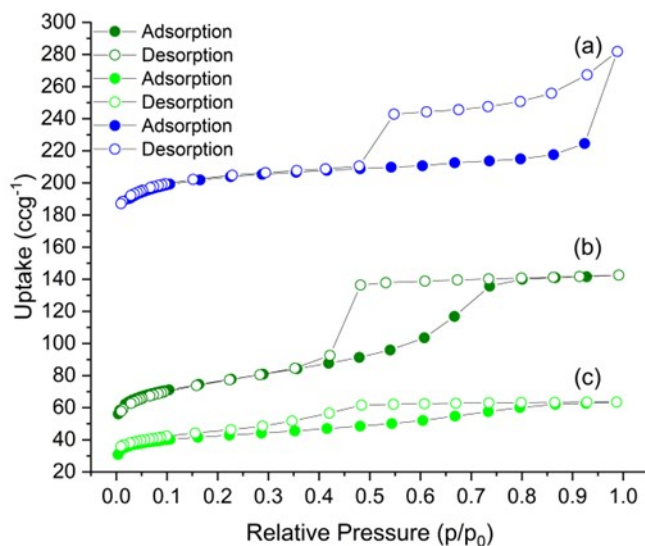

**Fig. S7** Nitrogen adsorption/desorption isotherms of HKUST-1 (a), PV<sub>2</sub>W<sub>10</sub>@HKUST-1 (b), and PVW<sub>11</sub>@HKUST-1 (c). BET surface area: 674 m<sup>2</sup>/g (HKUST-1); 261 m<sup>2</sup>/g (2); 145 m<sup>2</sup>/g (1).

**Table S11.** BET surface areas

|                                          | BET surface area (m <sup>2</sup> /g) |
|------------------------------------------|--------------------------------------|
| HKUST-1                                  | 674                                  |
| PV <sub>2</sub> W <sub>10</sub> @HKUST-1 | 261                                  |
| PVW <sub>11</sub> @HKUST-1               | 145                                  |

## References

1. S. S.-Y. Chui, S. M.-F. Lo, J. P. H. Charmant, A. G. Orpen and I. D. Williams, *Science*, 1999, **283**, 1148-1150.
